# Supplementary material for: Tribological Performance of a Paraffinic Base Oil Additive with Coated and Uncoated SiO2 Nanoparticles
Source: MDPI journal article supplement (doi:10.3390/ma17091993), 2024-04-25
Supplement: s1 [file s1]

# Tribological Performance of a Paraffinic Base Oil Additivated with Coated and Uncoated SiO<sub>2</sub> Nanoparticles

José M. Liñeira del Río <sup>1,\*</sup>, María J. G. Guimarey <sup>1</sup>, Vanesa Somoza <sup>1</sup>, Fátima Mariño <sup>2</sup> and María J. P. Comuñas <sup>1</sup>

<sup>1</sup> Laboratory of Thermophysical and Tribological Properties, Nafomat Group, Department of Applied Physics, Faculty of Physics and Instituto de Materiais (iMATUS), Universidade de Santiago de Compostela, 15782 Santiago de Compostela, Spain; mariajesus.guimarey@usc.es (M.J.G.G.); vanesa.somoza@rai.usc.es (V.S.); mariajp.comunas@usc.es (M.J.P.C.)

<sup>2</sup> School of Engineering, University of the Basque Country UPV/EHU, Plaza Ingeniero Torres Quevedo 1, 48013 Bilbao, Spain; fatima.marino@ehu.eus

\* Correspondence: josemanuel.lineira@usc.es

**Table S1:** Experimental density,  $\rho^a$ , determined with Stabinger densimeter for the paraffinic base oil and the nanolubricants at different temperatures,  $T^b$ , and 0.0991 MPa<sup>c</sup>.

| $T/K$                                                 | $\rho/g \cdot cm^{-3}$ | $T/K$  | $\rho/g \cdot cm^{-3}$ | $T/K$  | $\rho/g \cdot cm^{-3}$ |
|-------------------------------------------------------|------------------------|--------|------------------------|--------|------------------------|
| <i>Paraffinic base oil</i>                            |                        |        |                        |        |                        |
| 278.15                                                | 0.8447                 | 313.15 | 0.8234                 | 348.15 | 0.8020                 |
| 283.15                                                | 0.8417                 | 318.15 | 0.8204                 | 353.15 | 0.7989                 |
| 288.15                                                | 0.8387                 | 323.15 | 0.8173                 | 358.15 | 0.7958                 |
| 293.15                                                | 0.8356                 | 328.15 | 0.8143                 | 363.15 | 0.7927                 |
| 298.15                                                | 0.8326                 | 333.15 | 0.8112                 | 368.15 | 0.7896                 |
| 303.15                                                | 0.8295                 | 338.15 | 0.8081                 | 373.15 | 0.7865                 |
| 308.15                                                | 0.8265                 | 343.15 | 0.8050                 |        |                        |
| <i>Paraffinic base oil + 0.15 wt% SiO<sub>2</sub></i> |                        |        |                        |        |                        |
| 278.15                                                | 0.8458                 | 313.15 | 0.8244                 | 348.15 | 0.8027                 |
| 283.15                                                | 0.8427                 | 318.15 | 0.8213                 | 353.15 | 0.7996                 |
| 288.15                                                | 0.8397                 | 323.15 | 0.8182                 | 358.15 | 0.7965                 |
| 293.15                                                | 0.8366                 | 328.15 | 0.8151                 | 363.15 | 0.7933                 |
| 298.15                                                | 0.8336                 | 333.15 | 0.8120                 | 368.15 | 0.7902                 |
| 303.15                                                | 0.8305                 | 338.15 | 0.8089                 | 373.15 | 0.7871                 |
| 308.15                                                | 0.8275                 | 343.15 | 0.8058                 |        |                        |
| <i>Paraffinic base oil + 0.30 wt% SiO<sub>2</sub></i> |                        |        |                        |        |                        |
| 278.15                                                | 0.8466                 | 313.15 | 0.8252                 | 348.15 | 0.8035                 |
| 283.15                                                | 0.8435                 | 318.15 | 0.8221                 | 353.15 | 0.8004                 |
| 288.15                                                | 0.8405                 | 323.15 | 0.8190                 | 358.15 | 0.7972                 |
| 293.15                                                | 0.8374                 | 328.15 | 0.8159                 | 363.15 | 0.7941                 |
| 298.15                                                | 0.8344                 | 333.15 | 0.8128                 | 368.15 | 0.7910                 |
| 303.15                                                | 0.8313                 | 338.15 | 0.8097                 | 373.15 | 0.7879                 |

|                                                            |        |        |        |        |        |
|------------------------------------------------------------|--------|--------|--------|--------|--------|
| 308.15                                                     | 0.8283 | 343.15 | 0.8066 |        |        |
| <i>Paraffinic base oil + 0.45 wt% SiO<sub>2</sub></i>      |        |        |        |        |        |
| 278.15                                                     | 0.8473 | 313.15 | 0.8259 | 348.15 | 0.8042 |
| 283.15                                                     | 0.8442 | 318.15 | 0.8228 | 353.15 | 0.8011 |
| 288.15                                                     | 0.8412 | 323.15 | 0.8197 | 358.15 | 0.7979 |
| 293.15                                                     | 0.8381 | 328.15 | 0.8166 | 363.15 | 0.7948 |
| 298.15                                                     | 0.8351 | 333.15 | 0.8135 | 368.15 | 0.7917 |
| 303.15                                                     | 0.8320 | 338.15 | 0.8104 | 373.15 | 0.7886 |
| 308.15                                                     | 0.8290 | 343.15 | 0.8073 |        |        |
| <i>Paraffinic base oil + 0.60 wt% SiO<sub>2</sub></i>      |        |        |        |        |        |
| 278.15                                                     | 0.8476 | 313.15 | 0.8263 | 348.15 | 0.8047 |
| 283.15                                                     | 0.8446 | 318.15 | 0.8232 | 353.15 | 0.8016 |
| 288.15                                                     | 0.8415 | 323.15 | 0.8202 | 358.15 | 0.7985 |
| 293.15                                                     | 0.8385 | 328.15 | 0.8171 | 363.15 | 0.7954 |
| 298.15                                                     | 0.8355 | 333.15 | 0.8140 | 368.15 | 0.7923 |
| 303.15                                                     | 0.8324 | 338.15 | 0.8109 | 373.15 | 0.7892 |
| 308.15                                                     | 0.8294 | 343.15 | 0.8078 |        |        |
| <i>Paraffinic base oil + 0.15 wt% SiO<sub>2</sub> – SA</i> |        |        |        |        |        |
| 278.15                                                     | 0.8451 | 313.15 | 0.8238 | 348.15 | 0.8022 |
| 283.15                                                     | 0.8421 | 318.15 | 0.8207 | 353.15 | 0.7991 |
| 288.15                                                     | 0.8390 | 323.15 | 0.8177 | 358.15 | 0.7960 |
| 293.15                                                     | 0.8360 | 328.15 | 0.8146 | 363.15 | 0.7929 |
| 298.15                                                     | 0.8329 | 333.15 | 0.8115 | 368.15 | 0.7898 |
| 303.15                                                     | 0.8299 | 338.15 | 0.8084 | 373.15 | 0.7867 |
| 308.15                                                     | 0.8268 | 343.15 | 0.8053 |        |        |
| <i>Paraffinic base oil + 0.30 wt% SiO<sub>2</sub> – SA</i> |        |        |        |        |        |
| 278.15                                                     | 0.8452 | 313.15 | 0.8238 | 348.15 | 0.8021 |
| 283.15                                                     | 0.8421 | 318.15 | 0.8207 | 353.15 | 0.7990 |
| 288.15                                                     | 0.8391 | 323.15 | 0.8177 | 358.15 | 0.7959 |
| 293.15                                                     | 0.8360 | 328.15 | 0.8146 | 363.15 | 0.7928 |
| 298.15                                                     | 0.8330 | 333.15 | 0.8115 | 368.15 | 0.7897 |
| 303.15                                                     | 0.8300 | 338.15 | 0.8084 | 373.15 | 0.7866 |
| 308.15                                                     | 0.8269 | 343.15 | 0.8052 |        |        |
| <i>Paraffinic base oil + 0.45 wt% SiO<sub>2</sub> – SA</i> |        |        |        |        |        |
| 278.15                                                     | 0.8452 | 313.15 | 0.8238 | 348.15 | 0.8020 |
| 283.15                                                     | 0.8421 | 318.15 | 0.8207 | 353.15 | 0.7989 |
| 288.15                                                     | 0.8391 | 323.15 | 0.8176 | 358.15 | 0.7958 |
| 293.15                                                     | 0.8360 | 328.15 | 0.8145 | 363.15 | 0.7927 |
| 298.15                                                     | 0.8330 | 333.15 | 0.8114 | 368.15 | 0.7896 |
| 303.15                                                     | 0.8299 | 338.15 | 0.8083 | 373.15 | 0.7865 |
| 308.15                                                     | 0.8269 | 343.15 | 0.8051 |        |        |

*Paraffinic base oil + 0.60 wt% SiO<sub>2</sub> – SA*

|        |        |        |        |        |        |
|--------|--------|--------|--------|--------|--------|
| 278.15 | 0.8451 | 313.15 | 0.8238 | 348.15 | 0.8022 |
| 283.15 | 0.8420 | 318.15 | 0.8207 | 353.15 | 0.7991 |
| 288.15 | 0.8390 | 323.15 | 0.8177 | 358.15 | 0.7960 |
| 293.15 | 0.8360 | 328.15 | 0.8146 | 363.15 | 0.7929 |
| 298.15 | 0.8329 | 333.15 | 0.8115 | 368.15 | 0.7897 |
| 303.15 | 0.8299 | 338.15 | 0.8084 | 373.15 | 0.7866 |
| 308.15 | 0.8268 | 343.15 | 0.8053 |        |        |

<sup>a</sup> Combined expanded density uncertainty is  $U_c(\rho) = 5 \cdot 10^{-4} \text{ g} \cdot \text{cm}^{-3}$ ; <sup>b</sup> expanded temperature uncertainty is  $U(T) = 0.02 \text{ K}$  and <sup>c</sup> expanded pressure uncertainty is  $U(p) = 0.0005 \text{ MPa}$  (0.95 level of confidence).

**Table S2** Experimental viscosity,  $\eta$ , determined with Stabinger rotational viscometer for the paraffinic base oil and the nanolubricants at 0.0991 MPa<sup>b</sup> at different temperatures  $T^c$ .

| $T/\text{K}$                                          | $\eta/\text{mPa} \cdot \text{s}$ | $T/\text{K}$ | $\eta/\text{mPa} \cdot \text{s}$ | $T/\text{K}$ | $\eta/\text{mPa} \cdot \text{s}$ |
|-------------------------------------------------------|----------------------------------|--------------|----------------------------------|--------------|----------------------------------|
| <i>Paraffinic base oil</i>                            |                                  |              |                                  |              |                                  |
| 278.15                                                | 180.78                           | 313.15       | 28.850                           | 348.15       | 8.9519                           |
| 283.15                                                | 131.55                           | 318.15       | 23.626                           | 353.15       | 7.8537                           |
| 288.15                                                | 97.820                           | 323.15       | 19.589                           | 358.15       | 6.9407                           |
| 293.15                                                | 74.123                           | 328.15       | 16.432                           | 363.15       | 6.1776                           |
| 298.15                                                | 57.367                           | 333.15       | 13.924                           | 368.15       | 5.5339                           |
| 303.15                                                | 44.838                           | 338.15       | 11.910                           | 373.15       | 4.9905                           |
| 308.15                                                | 35.706                           | 343.15       | 10.285                           |              |                                  |
| <i>Paraffinic base oil + 0.15 wt% SiO<sub>2</sub></i> |                                  |              |                                  |              |                                  |
| 278.15                                                | 184.09                           | 313.15       | 29.334                           | 348.15       | 9.1231                           |
| 283.15                                                | 133.95                           | 318.15       | 24.021                           | 353.15       | 8.0063                           |
| 288.15                                                | 99.599                           | 323.15       | 19.915                           | 358.15       | 7.0747                           |
| 293.15                                                | 75.439                           | 328.15       | 16.702                           | 363.15       | 6.2992                           |
| 298.15                                                | 58.350                           | 333.15       | 14.174                           | 368.15       | 5.6439                           |
| 303.15                                                | 45.600                           | 338.15       | 12.132                           | 373.15       | 5.0860                           |
| 308.15                                                | 36.310                           | 343.15       | 10.476                           |              |                                  |
| <i>Paraffinic base oil + 0.30 wt% SiO<sub>2</sub></i> |                                  |              |                                  |              |                                  |
| 278.15                                                | 189.99                           | 313.15       | 30.111                           | 348.15       | 9.3296                           |
| 283.15                                                | 138.16                           | 318.15       | 24.649                           | 353.15       | 8.1934                           |
| 288.15                                                | 102.63                           | 323.15       | 20.420                           | 358.15       | 7.2505                           |
| 293.15                                                | 77.663                           | 328.15       | 17.108                           | 363.15       | 6.4561                           |
| 298.15                                                | 60.011                           | 333.15       | 14.496                           | 368.15       | 5.7882                           |
| 303.15                                                | 46.879                           | 338.15       | 12.407                           | 373.15       | 5.2189                           |
| 308.15                                                | 37.304                           | 343.15       | 10.708                           |              |                                  |
| <i>Paraffinic base oil + 0.45 wt% SiO<sub>2</sub></i> |                                  |              |                                  |              |                                  |
| 278.15                                                | 195.07                           | 313.15       | 30.819                           | 348.15       | 9.4995                           |
| 283.15                                                | 142.06                           | 318.15       | 25.196                           | 353.15       | 8.3351                           |
| 288.15                                                | 105.50                           | 323.15       | 20.847                           | 358.15       | 7.3777                           |

|                                                            |        |        |        |        |        |
|------------------------------------------------------------|--------|--------|--------|--------|--------|
| 293.15                                                     | 79.808 | 328.15 | 17.453 | 363.15 | 6.5733 |
| 298.15                                                     | 61.634 | 333.15 | 14.787 | 368.15 | 5.8965 |
| 303.15                                                     | 48.100 | 338.15 | 12.637 | 373.15 | 5.3191 |
| 308.15                                                     | 38.222 | 343.15 | 10.904 |        |        |
| <i>Paraffinic base oil + 0.60 wt% SiO<sub>2</sub></i>      |        |        |        |        |        |
| 278.15                                                     | 203.22 | 313.15 | 31.866 | 348.15 | 9.8839 |
| 283.15                                                     | 146.84 | 318.15 | 26.035 | 353.15 | 8.6905 |
| 288.15                                                     | 108.97 | 323.15 | 21.540 | 358.15 | 7.6958 |
| 293.15                                                     | 82.378 | 328.15 | 18.058 | 363.15 | 6.8634 |
| 298.15                                                     | 63.609 | 333.15 | 15.290 | 368.15 | 6.1547 |
| 303.15                                                     | 49.668 | 338.15 | 13.108 | 373.15 | 5.5460 |
| 308.15                                                     | 39.506 | 343.15 | 11.341 |        |        |
| <i>Paraffinic base oil + 0.15 wt% SiO<sub>2</sub> – SA</i> |        |        |        |        |        |
| 278.15                                                     | 203.60 | 313.15 | 32.636 | 348.15 | 10.171 |
| 283.15                                                     | 148.17 | 318.15 | 26.736 | 353.15 | 8.9304 |
| 288.15                                                     | 110.22 | 323.15 | 22.179 | 358.15 | 7.9086 |
| 293.15                                                     | 83.576 | 328.15 | 18.604 | 363.15 | 7.0083 |
| 298.15                                                     | 64.656 | 333.15 | 15.773 | 368.15 | 6.3092 |
| 303.15                                                     | 50.582 | 338.15 | 13.513 | 373.15 | 5.6613 |
| 308.15                                                     | 40.386 | 343.15 | 11.677 |        |        |
| <i>Paraffinic base oil + 0.30 wt% SiO<sub>2</sub> – SA</i> |        |        |        |        |        |
| 278.15                                                     | 213.19 | 313.15 | 34.157 | 348.15 | 10.585 |
| 283.15                                                     | 155.15 | 318.15 | 27.979 | 353.15 | 9.2876 |
| 288.15                                                     | 115.53 | 323.15 | 23.175 | 358.15 | 8.2184 |
| 293.15                                                     | 87.628 | 328.15 | 19.393 | 363.15 | 7.3156 |
| 298.15                                                     | 67.820 | 333.15 | 16.444 | 368.15 | 6.6231 |
| 303.15                                                     | 53.108 | 338.15 | 14.073 | 373.15 | 5.9662 |
| 308.15                                                     | 42.279 | 343.15 | 12.154 |        |        |
| <i>Paraffinic base oil + 0.45 wt% SiO<sub>2</sub> – SA</i> |        |        |        |        |        |
| 278.15                                                     | 211.33 | 313.15 | 33.688 | 348.15 | 10.508 |
| 283.15                                                     | 153.90 | 318.15 | 27.593 | 353.15 | 9.2334 |
| 288.15                                                     | 114.21 | 323.15 | 22.859 | 358.15 | 8.1706 |
| 293.15                                                     | 86.519 | 328.15 | 19.210 | 363.15 | 7.2776 |
| 298.15                                                     | 66.875 | 333.15 | 16.291 | 368.15 | 6.5231 |
| 303.15                                                     | 52.301 | 338.15 | 13.953 | 373.15 | 5.8877 |
| 308.15                                                     | 41.671 | 343.15 | 12.057 |        |        |
| <i>Paraffinic base oil + 0.60 wt% SiO<sub>2</sub> – SA</i> |        |        |        |        |        |
| 278.15                                                     | 211.90 | 313.15 | 33.949 | 348.15 | 10.570 |
| 283.15                                                     | 154.21 | 318.15 | 27.809 | 353.15 | 9.2784 |
| 288.15                                                     | 114.78 | 323.15 | 23.066 | 358.15 | 8.1988 |
| 293.15                                                     | 86.980 | 328.15 | 19.350 | 363.15 | 7.2938 |
| 298.15                                                     | 67.303 | 333.15 | 16.404 | 368.15 | 6.5358 |

---

|        |        |        |        |        |        |
|--------|--------|--------|--------|--------|--------|
| 303.15 | 52.697 | 338.15 | 14.040 | 373.15 | 5.9087 |
| 308.15 | 41.993 | 343.15 | 12.127 |        |        |

---

<sup>a</sup> Combined relative expanded viscosity uncertainty is  $U_c(\eta) = 1\%$ ; <sup>b</sup> expanded pressure uncertainty is  $U(p) = 0.0005$  MPa and <sup>c</sup> expanded temperature uncertainty is  $U(T) = 0.02$  K (0.95 level of confidence).
